# Supplementary material
Source: PubMed Central journal article supplement (PMC4166484)

Supporting information:

## From COX-2 inhibitor nimesulide to potent anti-cancer agent: synthesis, *in vitro* and *in vivo*, and pharmacokinetic evaluation

Bo Zhong, Xiaohan Cai, Snigdha Chennamaneni, Xin Yi, lili Liu, John J. Pink, Afshin Dowlati, Yan Xu, Aimin Zhou, Bin Su\*

### HPLC analysis of the purity of the compounds

For the HPLC analysis, a 1.00 mg/mL stock solution of each standard was prepared in either methanol or acetonitrile. The Beckman HPLC system consists of two LC-20AD pumps, a DGU-20A<sub>3</sub> degasser, a SIL-20AC autosampler, and a CBM-20A module (Shimadzu, Tokyo, Japan). The chromatographic separation was performed on a Luna C18 column (2.0 mm × 150 mm, 5 μm) with a guard column (2 mm × 40 mm, 5 μm) from Phenomenex (Torrance, CA, USA) at room temperature with a flow rate of 0.2 mL/min. Two mobile phases with 10mM ammonium acetate (10% water, 90% methanol; 20% water, 80% acetonitrile) were employed to run 15 min. An injection volume of 5-15μL was used. The UV detector was set up at 290 and 256nm.

| H <sub>2</sub> O/CH <sub>3</sub> OH (10%/90%) |                                                |        | H <sub>2</sub> O/CH <sub>3</sub> CN (20%/80%)  |        |
|-----------------------------------------------|------------------------------------------------|--------|------------------------------------------------|--------|
| Compd                                         | Retention time (R <sub>t</sub> )<br>in minutes | Purity | Retention time (R <sub>t</sub> )<br>in minutes | Purity |
| <b>1</b>                                      | 3.3                                            | 95.1%  | 4.0                                            | 94.1%  |
| <b>2</b>                                      | 3.3                                            | 95.3%  | 4.1                                            | 92.0%  |
| <b>3</b>                                      | 3.7                                            | 95.4%  | 4.7                                            | 92.8%  |
| <b>4</b>                                      | 4.8                                            | 96.5%  | 6.6                                            | 96.9%  |
| <b>5</b>                                      | 3.9                                            | 97.6%  | 5.4                                            | 92.7%  |
| <b>6</b>                                      | 4.3                                            | 95.3%  | 6.3                                            | 97.8%  |
| <b>7</b>                                      | 3.0                                            | 96.0%  | 3.6                                            | 82.1%  |
| <b>8</b>                                      | 3.0                                            | 97.7%  | 3.7                                            | 96.4%  |

|           |     |        |     |        |
|-----------|-----|--------|-----|--------|
| <b>9</b>  | 3.9 | 100.0% | 5.3 | 100.0% |
| <b>10</b> | 3.1 | 99.7%  | 3.7 | 97.9%  |
| <b>11</b> | 3.0 | 99.5%  | 3.7 | 98.4%  |
| <b>12</b> | 2.9 | 100.0% | 3.2 | 96.7%  |
| <b>14</b> | 3.5 | 99.1%  | 5.0 | 99.3%  |
| <b>15</b> | 3.7 | 100.0% | 5.2 | 99.5%  |
| <b>16</b> | 3.0 | 99.6%  | 3.5 | 99.2%  |
| <b>17</b> | 2.8 | 100.0% | 3.2 | 99.4%  |
| <b>18</b> | 3.2 | 99.6%  | 3.9 | 98.5%  |
| <b>19</b> | 3.3 | 100.0% | 4.6 | 99.3%  |
| <b>20</b> | 3.2 | 99.2%  | 4.0 | 99.0%  |
| <b>21</b> | 3.5 | 99.9%  | 4.7 | 99.8%  |
| <b>22</b> | 3.4 | 98.1%  | 4.4 | 100.0% |
| <b>23</b> | 3.4 | 99.4%  | 4.3 | 98.4%  |
| <b>24</b> | 3.2 | 99.2%  | 3.8 | 98.7%  |
| <b>25</b> | 3.4 | 95.4%  | 4.8 | 95.2%  |
| <b>26</b> | 5.0 | 99.8%  | 7.6 | 99.7%  |
| <b>27</b> | 3.9 | 99.9%  | 5.4 | 98.3%  |
| <b>28</b> | 3.8 | 98.2%  | 5.0 | 99.1%  |
| <b>29</b> | 4.0 | 99.7%  | 5.6 | 98.9%  |
| <b>30</b> | 3.5 | 99.6%  | 4.6 | 99.7%  |
| <b>31</b> | 3.3 | 93.7%  | 4.2 | 94.5%  |
| <b>32</b> | 3.5 | 99.2%  | 4.5 | 99.8%  |
| <b>33</b> | 3.8 | 97.9%  | 5.3 | 97.9%  |
| <b>34</b> | 3.7 | 99.5%  | 5.2 | 98.6%  |
| <b>35</b> | 3.8 | 99.2%  | 5.4 | 99.5%  |
| <b>36</b> | 3.4 | 98.8%  | 4.5 | 98.0%  |
| <b>37</b> | 2.9 | 99.9%  | 3.4 | 99.3%  |
| <b>38</b> | 3.1 | 99.7%  | 3.8 | 99.1%  |

**39**      2.8                              99.5%    3.2                              97.9%

---

\*Compound 13 was not subjected to HPLC analysis due to its poor solubility.

## Growth inhibitory effect of CSUOH0901 on 60 human tumor cell lines

This screening service was provided by the Developmental Therapeutics Program at National Cancer Institute. A sulforhodamine B (SRB) protein assay was used to estimate cell viability or growth.

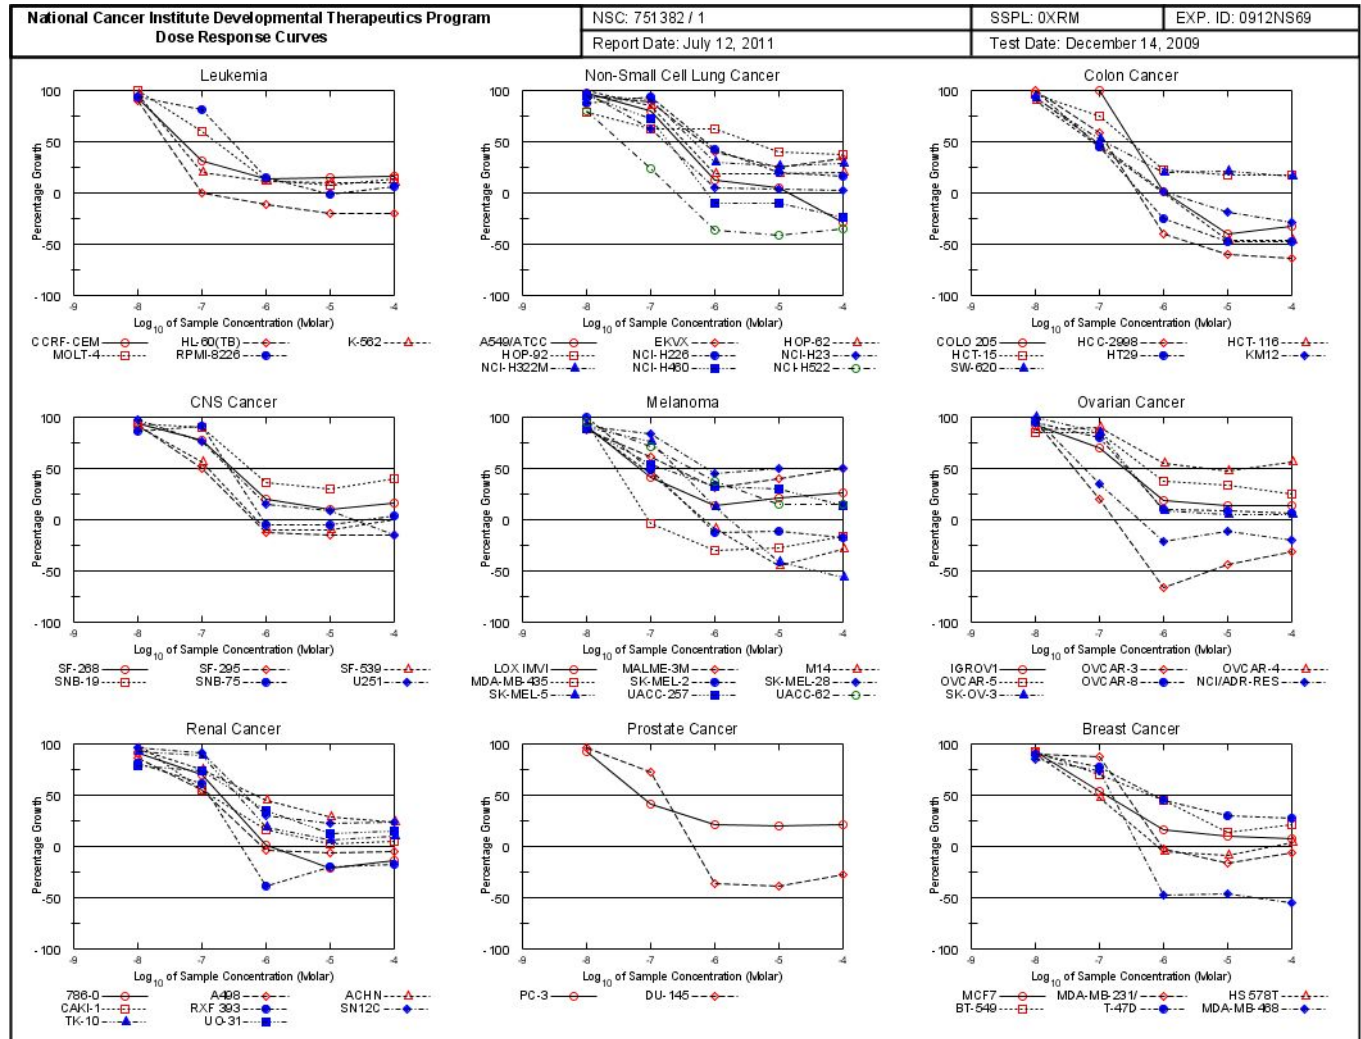

Supplement: NIHMS626890-supplement-01.pdf [file NIHMS626890-supplement-01.pdf]
